# Supplementary material
Source: publisher figshare collection journal article supplement (https://acs.figshare.com/ndownloader/files/4765024)
Supplement: Supplementary file 1 [file 4765024]

  
data_2wq152m 
  
_audit_creation_method            SHELXL-97 
_chemical_name_systematic 
; 
 ? 
; 
_chemical_name_common             ? 
_chemical_melting_point           ? 
_chemical_formula_moiety          ? 
_chemical_formula_sum 
 'C19 H19 N O6' 
_chemical_formula_weight          357.35 
  
loop_ 
 _atom_type_symbol 
 _atom_type_description 
 _atom_type_scat_dispersion_real 
 _atom_type_scat_dispersion_imag 
 _atom_type_scat_source 
 'C'  'C'   0.0033   0.0016 
 'International Tables Vol C Tables 4.2.6.8 and 6.1.1.4' 
 'H'  'H'   0.0000   0.0000 
 'International Tables Vol C Tables 4.2.6.8 and 6.1.1.4' 
 'N'  'N'   0.0061   0.0033 
 'International Tables Vol C Tables 4.2.6.8 and 6.1.1.4' 
 'O'  'O'   0.0106   0.0060 
 'International Tables Vol C Tables 4.2.6.8 and 6.1.1.4' 
  
_symmetry_cell_setting            Monoclinic 
_symmetry_space_group_name_H-M    P2(1) 
  
loop_ 
 _symmetry_equiv_pos_as_xyz 
 'x, y, z' 
 '-x, y+1/2, -z' 
  
_cell_length_a                    9.9530(15) 
_cell_length_b                    6.9505(11) 
_cell_length_c                    11.7107(18) 
_cell_angle_alpha                 90.00 
_cell_angle_beta                  98.204(3) 
_cell_angle_gamma                 90.00 
_cell_volume                      801.8(2) 
_cell_formula_units_Z             2 
_cell_measurement_temperature     100(2) 
_cell_measurement_reflns_used     2630 
_cell_measurement_theta_min       2.52 
_cell_measurement_theta_max       32.51 
  
_exptl_crystal_description        plate 
_exptl_crystal_colour             colorless 
_exptl_crystal_size_max           0.25 
_exptl_crystal_size_mid           0.20 
_exptl_crystal_size_min           0.03 
_exptl_crystal_density_meas       0 
_exptl_crystal_density_diffrn     1.480 
_exptl_crystal_density_method     'not measured' 
_exptl_crystal_F_000              376 
_exptl_absorpt_coefficient_mu     0.111 
_exptl_absorpt_correction_type    none 
_exptl_absorpt_correction_T_min   ? 
_exptl_absorpt_correction_T_max   ? 
_exptl_absorpt_process_details    ? 
  
_exptl_special_details 
; 
 ? 
; 
  
_diffrn_ambient_temperature       100(2) 
_diffrn_radiation_wavelength      0.71073 
_diffrn_radiation_type            MoK\a 
_diffrn_radiation_source          'fine-focus sealed tube' 
_diffrn_radiation_monochromator   graphite 
_diffrn_measurement_device_type   'CCD area detector' 
_diffrn_measurement_method        'phi and omega scans' 
_diffrn_detector_area_resol_mean  ? 
_diffrn_standards_number          ? 
_diffrn_standards_interval_count  ? 
_diffrn_standards_interval_time   ? 
_diffrn_standards_decay_%         ? 
_diffrn_reflns_number             10638 
_diffrn_reflns_av_R_equivalents   0.0782 
_diffrn_reflns_av_sigmaI/netI     0.1374 
_diffrn_reflns_limit_h_min        -15 
_diffrn_reflns_limit_h_max        15 
_diffrn_reflns_limit_k_min        -10 
_diffrn_reflns_limit_k_max        10 
_diffrn_reflns_limit_l_min        -17 
_diffrn_reflns_limit_l_max        17 
_diffrn_reflns_theta_min          1.76 
_diffrn_reflns_theta_max          32.99 
_reflns_number_total              5500 
_reflns_number_gt                 2834 
_reflns_threshold_expression      >2sigma(I) 
  
_computing_data_collection        'Bruker SMART' 
_computing_cell_refinement        'Bruker SMART' 
_computing_data_reduction         'Bruker SAINT' 
_computing_structure_solution     'SHELXS-97 (Sheldrick, 1990)' 
_computing_structure_refinement   'SHELXL-97 (Sheldrick, 1997)' 
_computing_molecular_graphics     'Bruker SHELXTL' 
_computing_publication_material   'Bruker SHELXTL' 
  
_refine_special_details 
; 
 Refinement of F^2^ against ALL reflections.  The weighted R-factor wR and 
 goodness of fit S are based on F^2^, conventional R-factors R are based 
 on F, with F set to zero for negative F^2^. The threshold expression of 
 F^2^ > 2sigma(F^2^) is used only for calculating R-factors(gt) etc. and is 
 not relevant to the choice of reflections for refinement.  R-factors based 
 on F^2^ are statistically about twice as large as those based on F, and R- 
 factors based on ALL data will be even larger. 
; 
  
_refine_ls_structure_factor_coef  Fsqd 
_refine_ls_matrix_type            full 
_refine_ls_weighting_scheme       calc 
_refine_ls_weighting_details 
 'calc w=1/[\s^2^(Fo^2^)+(0.0500P)^2^+0.0000P] where P=(Fo^2^+2Fc^2^)/3' 
_atom_sites_solution_primary      direct 
_atom_sites_solution_secondary    difmap 
_atom_sites_solution_hydrogens    geom 
_refine_ls_hydrogen_treatment     mixed 
_refine_ls_extinction_method      none 
_refine_ls_extinction_coef        ? 
_refine_ls_abs_structure_details 
 'Flack H D (1983), Acta Cryst. A39, 876-881' 
_refine_ls_abs_structure_Flack    -0.8(18) 
_refine_ls_number_reflns          5500 
_refine_ls_number_parameters      237 
_refine_ls_number_restraints      1 
_refine_ls_R_factor_all           0.1525 
_refine_ls_R_factor_gt            0.0882 
_refine_ls_wR_factor_ref          0.1772 
_refine_ls_wR_factor_gt           0.1548 
_refine_ls_goodness_of_fit_ref    1.004 
_refine_ls_restrained_S_all       1.003 
_refine_ls_shift/su_max           0.002 
_refine_ls_shift/su_mean          0.000 
  
loop_ 
 _atom_site_label 
 _atom_site_type_symbol 
 _atom_site_fract_x 
 _atom_site_fract_y 
 _atom_site_fract_z 
 _atom_site_U_iso_or_equiv 
 _atom_site_adp_type 
 _atom_site_occupancy 
 _atom_site_symmetry_multiplicity 
 _atom_site_calc_flag 
 _atom_site_refinement_flags 
 _atom_site_disorder_assembly 
 _atom_site_disorder_group 
C1 C 0.6071(4) 0.8662(6) 0.9603(3) 0.0365(10) Uani 1 1 d . A . 
H1A H 0.5367 0.8712 1.0120 0.044 Uiso 1 1 calc R . . 
H1B H 0.6536 0.7403 0.9716 0.044 Uiso 1 1 calc R . . 
C2 C 0.5391(4) 0.8829(8) 0.8350(3) 0.0498(13) Uani 1 1 d . A . 
H2 H 0.4770 0.9968 0.8271 0.060 Uiso 1 1 calc R . . 
C3 C 0.5057(4) 0.6292(6) 0.7037(4) 0.0368(9) Uani 1 1 d . . . 
C4 C 0.6426(3) 0.9012(8) 0.7464(3) 0.0445(12) Uani 1 1 d . . . 
H4 H 0.6259 1.0224 0.7005 0.053 Uiso 1 1 calc R A . 
C5 C 0.7883(3) 0.8949(6) 0.8074(3) 0.0318(9) Uani 1 1 d . A . 
H5 H 0.8041 0.7649 0.8434 0.038 Uiso 1 1 calc R . . 
C6 C 0.8968(3) 0.9281(6) 0.7308(3) 0.0277(8) Uani 1 1 d . . . 
C7 C 0.8721(4) 0.9123(7) 0.6095(3) 0.0389(11) Uani 1 1 d . A . 
H7 H 0.7840 0.8841 0.5704 0.047 Uiso 1 1 calc R . . 
C8 C 0.9793(4) 0.9391(7) 0.5501(3) 0.0357(10) Uani 1 1 d . . . 
C9 C 1.1177(4) 0.9423(7) 0.4161(3) 0.0434(11) Uani 1 1 d . . . 
H9A H 1.1480 0.8127 0.3958 0.052 Uiso 1 1 calc R A . 
H9B H 1.1310 1.0322 0.3531 0.052 Uiso 1 1 calc R . . 
C10 C 1.1077(3) 0.9803(6) 0.6040(3) 0.0328(9) Uani 1 1 d . A . 
C11 C 1.1364(3) 1.0003(6) 0.7212(3) 0.0274(8) Uani 1 1 d . . . 
H11 H 1.2249 1.0323 0.7580 0.033 Uiso 1 1 calc R A . 
C12 C 1.0278(3) 0.9709(5) 0.7845(3) 0.0216(7) Uani 1 1 d . A . 
C13 C 1.0593(3) 0.9904(6) 0.9124(3) 0.0273(8) Uani 1 1 d . . . 
C14 C 0.9433(3) 0.9845(5) 1.0869(2) 0.0249(7) Uani 1 1 d . . . 
C15 C 0.7973(3) 0.9990(6) 1.1097(2) 0.0271(8) Uani 1 1 d . A . 
H15A H 0.7865 1.1097 1.1608 0.032 Uiso 1 1 calc R . . 
H15B H 0.7707 0.8803 1.1475 0.032 Uiso 1 1 calc R . . 
C16 C 0.7094(3) 1.0261(6) 0.9928(3) 0.0296(8) Uani 1 1 d . . . 
H16 H 0.6591 1.1504 0.9941 0.035 Uiso 1 1 calc R A . 
C17 C 0.8098(3) 1.0429(5) 0.9030(3) 0.0230(7) Uani 1 1 d . A . 
H17 H 0.8048 1.1752 0.8691 0.028 Uiso 1 1 calc R . . 
N1 N 0.9459(2) 1.0109(5) 0.9692(2) 0.0237(6) Uani 1 1 d . A . 
O1 O 0.4629(3) 0.7135(6) 0.8014(3) 0.0727(12) Uani 1 1 d . A . 
O2 O 0.6143(3) 0.7372(6) 0.6738(2) 0.0778(14) Uani 1 1 d . A . 
O3 O 0.9765(3) 0.9377(5) 0.43217(19) 0.0474(9) Uani 1 1 d . A . 
O4 O 1.1936(2) 1.0053(5) 0.52267(19) 0.0464(8) Uani 1 1 d . A . 
O5 O 1.1744(2) 0.9874(4) 0.96310(18) 0.0339(6) Uani 1 1 d . A . 
O6 O 1.0409(2) 0.9538(4) 1.15788(18) 0.0350(7) Uani 1 1 d . A . 
C18A C 0.4008(6) 0.5866(10) 0.6131(5) 0.0346(15) Uiso 0.60 1 d P A 1 
H18A H 0.4400 0.5357 0.5472 0.052 Uiso 0.60 1 calc PR A 1 
H18B H 0.3495 0.7040 0.5901 0.052 Uiso 0.60 1 calc PR A 1 
H18C H 0.3399 0.4904 0.6393 0.052 Uiso 0.60 1 calc PR A 1 
C19A C 0.5876(6) 0.4649(10) 0.7609(5) 0.0321(13) Uiso 0.60 1 d P A 1 
H19A H 0.6524 0.5140 0.8251 0.048 Uiso 0.60 1 calc PR A 1 
H19B H 0.6369 0.4017 0.7046 0.048 Uiso 0.60 1 calc PR A 1 
H19C H 0.5267 0.3721 0.7901 0.048 Uiso 0.60 1 calc PR A 1 
C18B C 0.3941(8) 0.7060(13) 0.6056(7) 0.0213(17) Uiso 0.40 1 d P A 2 
H18D H 0.3987 0.6337 0.5344 0.032 Uiso 0.40 1 calc PR A 2 
H18E H 0.4099 0.8428 0.5922 0.032 Uiso 0.40 1 calc PR A 2 
H18F H 0.3042 0.6894 0.6291 0.032 Uiso 0.40 1 calc PR A 2 
C19B C 0.5087(11) 0.3996(17) 0.6955(9) 0.046(3) Uiso 0.40 1 d P A 2 
H19D H 0.5903 0.3506 0.7434 0.069 Uiso 0.40 1 calc PR A 2 
H19E H 0.5098 0.3611 0.6151 0.069 Uiso 0.40 1 calc PR A 2 
H19F H 0.4279 0.3464 0.7229 0.069 Uiso 0.40 1 calc PR A 2 
  
loop_ 
 _atom_site_aniso_label 
 _atom_site_aniso_U_11 
 _atom_site_aniso_U_22 
 _atom_site_aniso_U_33 
 _atom_site_aniso_U_23 
 _atom_site_aniso_U_13 
 _atom_site_aniso_U_12 
C1 0.033(2) 0.055(3) 0.0249(19) -0.0049(18) 0.0144(15) -0.0113(19) 
C2 0.0257(19) 0.092(4) 0.032(2) -0.005(2) 0.0063(16) -0.006(2) 
C3 0.031(2) 0.037(2) 0.046(2) -0.0002(19) 0.0196(18) 0.0005(18) 
C4 0.0210(18) 0.090(4) 0.0224(18) -0.004(2) 0.0019(14) -0.011(2) 
C5 0.0258(17) 0.052(3) 0.0184(16) -0.0028(17) 0.0063(13) -0.0102(17) 
C6 0.0260(17) 0.041(2) 0.0171(15) 0.0008(16) 0.0075(13) -0.0042(16) 
C7 0.0275(18) 0.067(3) 0.0217(17) -0.0145(19) 0.0023(14) -0.019(2) 
C8 0.0346(19) 0.057(3) 0.0161(16) 0.0045(18) 0.0040(14) -0.0056(19) 
C9 0.040(2) 0.067(3) 0.0249(18) -0.003(2) 0.0109(15) -0.017(2) 
C10 0.0291(18) 0.045(3) 0.0273(17) 0.0082(19) 0.0150(14) -0.0068(19) 
C11 0.0240(16) 0.039(2) 0.0201(15) 0.0036(16) 0.0051(12) -0.0111(17) 
C12 0.0272(16) 0.0171(17) 0.0206(14) 0.0036(14) 0.0034(12) -0.0035(14) 
C13 0.0256(17) 0.037(2) 0.0195(16) 0.0051(17) 0.0032(13) 0.0019(18) 
C14 0.0317(17) 0.0269(19) 0.0163(15) -0.0043(16) 0.0046(13) -0.0015(17) 
C15 0.0298(17) 0.035(2) 0.0174(15) -0.0015(16) 0.0058(12) 0.0010(18) 
C16 0.0262(17) 0.036(2) 0.0273(17) 0.0035(16) 0.0077(14) 0.0091(16) 
C17 0.0201(16) 0.028(2) 0.0210(15) 0.0023(14) 0.0039(12) 0.0014(14) 
N1 0.0215(13) 0.0329(18) 0.0169(12) -0.0023(13) 0.0035(10) -0.0044(13) 
O1 0.058(2) 0.116(3) 0.0510(19) -0.042(2) 0.0323(16) -0.055(2) 
O2 0.0516(19) 0.141(4) 0.0461(18) -0.052(2) 0.0245(16) -0.059(2) 
O3 0.0407(15) 0.084(3) 0.0185(12) -0.0068(15) 0.0095(11) -0.0228(16) 
O4 0.0392(15) 0.083(2) 0.0191(12) 0.0012(15) 0.0125(11) -0.0133(17) 
O5 0.0231(11) 0.0579(19) 0.0203(11) -0.0030(13) 0.0020(9) -0.0004(13) 
O6 0.0313(13) 0.053(2) 0.0202(11) -0.0019(13) 0.0018(10) 0.0021(14) 
  
_geom_special_details 
; 
 All esds (except the esd in the dihedral angle between two l.s. planes) 
 are estimated using the full covariance matrix.  The cell esds are taken 
 into account individually in the estimation of esds in distances, angles 
 and torsion angles; correlations between esds in cell parameters are only 
 used when they are defined by crystal symmetry.  An approximate (isotropic) 
 treatment of cell esds is used for estimating esds involving l.s. planes. 
; 
  
loop_ 
 _geom_bond_atom_site_label_1 
 _geom_bond_atom_site_label_2 
 _geom_bond_distance 
 _geom_bond_site_symmetry_2 
 _geom_bond_publ_flag 
C1 C16 1.518(5) . ? 
C1 C2 1.530(5) . ? 
C1 H1A 0.9900 . ? 
C1 H1B 0.9900 . ? 
C2 O1 1.425(6) . ? 
C2 C4 1.568(5) . ? 
C2 H2 1.0000 . ? 
C3 O2 1.401(5) . ? 
C3 O1 1.405(5) . ? 
C3 C18A 1.410(7) . ? 
C3 C19A 1.503(7) . ? 
C3 C18B 1.573(9) . ? 
C3 C19B 1.600(12) . ? 
C4 O2 1.426(5) . ? 
C4 C5 1.524(5) . ? 
C4 H4 1.0000 . ? 
C5 C17 1.514(5) . ? 
C5 C6 1.516(4) . ? 
C5 H5 1.0000 . ? 
C6 C12 1.397(4) . ? 
C6 C7 1.411(4) . ? 
C7 C8 1.367(5) . ? 
C7 H7 0.9500 . ? 
C8 C10 1.372(5) . ? 
C8 O3 1.377(4) . ? 
C9 O4 1.432(4) . ? 
C9 O3 1.445(4) . ? 
C9 H9A 0.9900 . ? 
C9 H9B 0.9900 . ? 
C10 C11 1.369(4) . ? 
C10 O4 1.378(4) . ? 
C11 C12 1.410(4) . ? 
C11 H11 0.9500 . ? 
C12 C13 1.492(4) . ? 
C13 O5 1.213(3) . ? 
C13 N1 1.397(4) . ? 
C14 O6 1.203(3) . ? 
C14 N1 1.395(4) . ? 
C14 C15 1.518(4) . ? 
C15 C16 1.528(4) . ? 
C15 H15A 0.9900 . ? 
C15 H15B 0.9900 . ? 
C16 C17 1.555(4) . ? 
C16 H16 1.0000 . ? 
C17 N1 1.478(4) . ? 
C17 H17 1.0000 . ? 
C18A H18A 0.9800 . ? 
C18A H18B 0.9800 . ? 
C18A H18C 0.9800 . ? 
C19A H19A 0.9800 . ? 
C19A H19B 0.9800 . ? 
C19A H19C 0.9800 . ? 
C18B H18D 0.9800 . ? 
C18B H18E 0.9800 . ? 
C18B H18F 0.9800 . ? 
C19B H19D 0.9800 . ? 
C19B H19E 0.9800 . ? 
C19B H19F 0.9800 . ? 
  
loop_ 
 _geom_angle_atom_site_label_1 
 _geom_angle_atom_site_label_2 
 _geom_angle_atom_site_label_3 
 _geom_angle 
 _geom_angle_site_symmetry_1 
 _geom_angle_site_symmetry_3 
 _geom_angle_publ_flag 
C16 C1 C2 111.9(3) . . ? 
C16 C1 H1A 109.2 . . ? 
C2 C1 H1A 109.2 . . ? 
C16 C1 H1B 109.2 . . ? 
C2 C1 H1B 109.2 . . ? 
H1A C1 H1B 107.9 . . ? 
O1 C2 C1 110.3(4) . . ? 
O1 C2 C4 105.0(3) . . ? 
C1 C2 C4 113.5(3) . . ? 
O1 C2 H2 109.3 . . ? 
C1 C2 H2 109.3 . . ? 
C4 C2 H2 109.3 . . ? 
O2 C3 O1 108.4(3) . . ? 
O2 C3 C18A 116.1(4) . . ? 
O1 C3 C18A 115.0(4) . . ? 
O2 C3 C19A 97.5(4) . . ? 
O1 C3 C19A 99.3(4) . . ? 
C18A C3 C19A 118.1(5) . . ? 
O2 C3 C18B 97.2(4) . . ? 
O1 C3 C18B 100.9(4) . . ? 
C18A C3 C18B 32.0(4) . . ? 
C19A C3 C18B 149.8(5) . . ? 
O2 C3 C19B 119.8(5) . . ? 
O1 C3 C19B 118.4(5) . . ? 
C18A C3 C19B 76.3(6) . . ? 
C19A C3 C19B 41.9(4) . . ? 
C18B C3 C19B 108.2(6) . . ? 
O2 C4 C5 110.5(4) . . ? 
O2 C4 C2 103.7(3) . . ? 
C5 C4 C2 111.0(3) . . ? 
O2 C4 H4 110.5 . . ? 
C5 C4 H4 110.5 . . ? 
C2 C4 H4 110.5 . . ? 
C17 C5 C6 107.3(3) . . ? 
C17 C5 C4 110.6(3) . . ? 
C6 C5 C4 115.4(3) . . ? 
C17 C5 H5 107.8 . . ? 
C6 C5 H5 107.8 . . ? 
C4 C5 H5 107.8 . . ? 
C12 C6 C7 119.1(3) . . ? 
C12 C6 C5 117.6(3) . . ? 
C7 C6 C5 123.2(3) . . ? 
C8 C7 C6 117.8(3) . . ? 
C8 C7 H7 121.1 . . ? 
C6 C7 H7 121.1 . . ? 
C7 C8 C10 122.5(3) . . ? 
C7 C8 O3 127.1(3) . . ? 
C10 C8 O3 110.3(3) . . ? 
O4 C9 O3 107.2(3) . . ? 
O4 C9 H9A 110.3 . . ? 
O3 C9 H9A 110.3 . . ? 
O4 C9 H9B 110.3 . . ? 
O3 C9 H9B 110.3 . . ? 
H9A C9 H9B 108.5 . . ? 
C11 C10 C8 122.0(3) . . ? 
C11 C10 O4 128.3(3) . . ? 
C8 C10 O4 109.7(3) . . ? 
C10 C11 C12 116.5(3) . . ? 
C10 C11 H11 121.7 . . ? 
C12 C11 H11 121.7 . . ? 
C6 C12 C11 122.1(3) . . ? 
C6 C12 C13 121.4(3) . . ? 
C11 C12 C13 116.6(3) . . ? 
O5 C13 N1 122.7(3) . . ? 
O5 C13 C12 122.6(3) . . ? 
N1 C13 C12 114.7(3) . . ? 
O6 C14 N1 125.4(3) . . ? 
O6 C14 C15 126.1(3) . . ? 
N1 C14 C15 108.5(2) . . ? 
C14 C15 C16 106.9(2) . . ? 
C14 C15 H15A 110.3 . . ? 
C16 C15 H15A 110.3 . . ? 
C14 C15 H15B 110.3 . . ? 
C16 C15 H15B 110.3 . . ? 
H15A C15 H15B 108.6 . . ? 
C1 C16 C15 114.3(3) . . ? 
C1 C16 C17 111.0(3) . . ? 
C15 C16 C17 105.9(2) . . ? 
C1 C16 H16 108.5 . . ? 
C15 C16 H16 108.5 . . ? 
C17 C16 H16 108.5 . . ? 
N1 C17 C5 107.9(3) . . ? 
N1 C17 C16 105.3(2) . . ? 
C5 C17 C16 114.3(3) . . ? 
N1 C17 H17 109.7 . . ? 
C5 C17 H17 109.7 . . ? 
C16 C17 H17 109.7 . . ? 
C14 N1 C13 125.9(3) . . ? 
C14 N1 C17 113.2(2) . . ? 
C13 N1 C17 120.6(2) . . ? 
C3 O1 C2 110.9(3) . . ? 
C3 O2 C4 111.9(3) . . ? 
C8 O3 C9 104.4(3) . . ? 
C10 O4 C9 105.2(3) . . ? 
C3 C18A H18A 109.5 . . ? 
C3 C18A H18B 109.5 . . ? 
C3 C18A H18C 109.5 . . ? 
C3 C19A H19A 109.5 . . ? 
C3 C19A H19B 109.5 . . ? 
C3 C19A H19C 109.5 . . ? 
C3 C18B H18D 109.5 . . ? 
C3 C18B H18E 109.5 . . ? 
H18D C18B H18E 109.5 . . ? 
C3 C18B H18F 109.5 . . ? 
H18D C18B H18F 109.5 . . ? 
H18E C18B H18F 109.5 . . ? 
C3 C19B H19D 109.5 . . ? 
C3 C19B H19E 109.5 . . ? 
H19D C19B H19E 109.5 . . ? 
C3 C19B H19F 109.5 . . ? 
H19D C19B H19F 109.5 . . ? 
H19E C19B H19F 109.5 . . ? 
  
loop_ 
 _geom_torsion_atom_site_label_1 
 _geom_torsion_atom_site_label_2 
 _geom_torsion_atom_site_label_3 
 _geom_torsion_atom_site_label_4 
 _geom_torsion 
 _geom_torsion_site_symmetry_1 
 _geom_torsion_site_symmetry_2 
 _geom_torsion_site_symmetry_3 
 _geom_torsion_site_symmetry_4 
 _geom_torsion_publ_flag 
C16 C1 C2 O1 169.6(3) . . . . ? 
C16 C1 C2 C4 52.1(5) . . . . ? 
O1 C2 C4 O2 -1.0(5) . . . . ? 
C1 C2 C4 O2 119.5(4) . . . . ? 
O1 C2 C4 C5 -119.7(4) . . . . ? 
C1 C2 C4 C5 0.8(6) . . . . ? 
O2 C4 C5 C17 -167.7(3) . . . . ? 
C2 C4 C5 C17 -53.1(5) . . . . ? 
O2 C4 C5 C6 70.3(5) . . . . ? 
C2 C4 C5 C6 -175.1(4) . . . . ? 
C17 C5 C6 C12 40.8(4) . . . . ? 
C4 C5 C6 C12 164.6(4) . . . . ? 
C17 C5 C6 C7 -141.0(4) . . . . ? 
C4 C5 C6 C7 -17.2(6) . . . . ? 
C12 C6 C7 C8 0.4(6) . . . . ? 
C5 C6 C7 C8 -177.8(4) . . . . ? 
C6 C7 C8 C10 -0.1(7) . . . . ? 
C6 C7 C8 O3 -177.3(4) . . . . ? 
C7 C8 C10 C11 -1.0(7) . . . . ? 
O3 C8 C10 C11 176.6(4) . . . . ? 
C7 C8 C10 O4 -178.2(4) . . . . ? 
O3 C8 C10 O4 -0.6(5) . . . . ? 
C8 C10 C11 C12 1.7(7) . . . . ? 
O4 C10 C11 C12 178.3(4) . . . . ? 
C7 C6 C12 C11 0.4(6) . . . . ? 
C5 C6 C12 C11 178.7(4) . . . . ? 
C7 C6 C12 C13 179.6(4) . . . . ? 
C5 C6 C12 C13 -2.1(5) . . . . ? 
C10 C11 C12 C6 -1.4(6) . . . . ? 
C10 C11 C12 C13 179.3(3) . . . . ? 
C6 C12 C13 O5 164.2(4) . . . . ? 
C11 C12 C13 O5 -16.5(6) . . . . ? 
C6 C12 C13 N1 -15.3(5) . . . . ? 
C11 C12 C13 N1 163.9(3) . . . . ? 
O6 C14 C15 C16 -176.4(4) . . . . ? 
N1 C14 C15 C16 3.0(4) . . . . ? 
C2 C1 C16 C15 -170.4(3) . . . . ? 
C2 C1 C16 C17 -50.7(4) . . . . ? 
C14 C15 C16 C1 118.2(3) . . . . ? 
C14 C15 C16 C17 -4.3(4) . . . . ? 
C6 C5 C17 N1 -61.4(3) . . . . ? 
C4 C5 C17 N1 171.9(3) . . . . ? 
C6 C5 C17 C16 -178.2(3) . . . . ? 
C4 C5 C17 C16 55.1(4) . . . . ? 
C1 C16 C17 N1 -120.6(3) . . . . ? 
C15 C16 C17 N1 4.1(4) . . . . ? 
C1 C16 C17 C5 -2.3(4) . . . . ? 
C15 C16 C17 C5 122.4(3) . . . . ? 
O6 C14 N1 C13 5.7(6) . . . . ? 
C15 C14 N1 C13 -173.7(3) . . . . ? 
O6 C14 N1 C17 179.1(4) . . . . ? 
C15 C14 N1 C17 -0.4(4) . . . . ? 
O5 C13 N1 C14 -16.3(6) . . . . ? 
C12 C13 N1 C14 163.2(3) . . . . ? 
O5 C13 N1 C17 170.8(4) . . . . ? 
C12 C13 N1 C17 -9.7(5) . . . . ? 
C5 C17 N1 C14 -124.9(3) . . . . ? 
C16 C17 N1 C14 -2.4(4) . . . . ? 
C5 C17 N1 C13 48.8(4) . . . . ? 
C16 C17 N1 C13 171.4(3) . . . . ? 
O2 C3 O1 C2 2.3(5) . . . . ? 
C18A C3 O1 C2 -129.5(5) . . . . ? 
C19A C3 O1 C2 103.4(5) . . . . ? 
C18B C3 O1 C2 -99.2(5) . . . . ? 
C19B C3 O1 C2 143.1(6) . . . . ? 
C1 C2 O1 C3 -123.4(4) . . . . ? 
C4 C2 O1 C3 -0.7(5) . . . . ? 
O1 C3 O2 C4 -3.0(5) . . . . ? 
C18A C3 O2 C4 128.1(5) . . . . ? 
C19A C3 O2 C4 -105.5(4) . . . . ? 
C18B C3 O2 C4 101.0(5) . . . . ? 
C19B C3 O2 C4 -143.2(6) . . . . ? 
C5 C4 O2 C3 121.5(4) . . . . ? 
C2 C4 O2 C3 2.4(5) . . . . ? 
C7 C8 O3 C9 -171.3(5) . . . . ? 
C10 C8 O3 C9 11.3(5) . . . . ? 
O4 C9 O3 C8 -17.5(5) . . . . ? 
C11 C10 O4 C9 172.6(5) . . . . ? 
C8 C10 O4 C9 -10.5(5) . . . . ? 
O3 C9 O4 C10 17.2(4) . . . . ? 
  
_diffrn_measured_fraction_theta_max    0.952 
_diffrn_reflns_theta_full              32.99 
_diffrn_measured_fraction_theta_full   0.952 
_refine_diff_density_max    0.430 
_refine_diff_density_min   -0.294 
_refine_diff_density_rms    0.081 
